# Supplementary material for: Halide metathesis in overdrive: mechanochemical synthesis of a heterometallic group 1 allyl complex
Source: Beilstein J Org Chem. 2019 Aug 2;15:1856–63. doi: 10.3762/bjoc.15.181 (PMC6693392; doi:10.3762/bjoc.15.181)
Supplement: File 2 — Coordinates of DFT-optimized structures. [file Beilstein_J_Org_Chem-15-1856-s002.xyz]

1
[K]+, KH; B3PW91-D3BJ/def2TZVPD; ?Gø = -599.721828 au
K	0.000000	0.000000	0.000000
1
[Cs]+, KH; B3PW91-D3BJ/def2TZVPD; ?Gø = -20.047814 au
Cs	0.000000	0.000000	0.000000
8
[C3H5]-, C1; B3PW91-D3BJ/def2TZVPD; ?Gø = -117.240692 au
C	-1.271336	-0.895814	-0.000183
C	-0.000001	-0.338094	-0.000054
C	1.271334	-0.895816	-0.000104
H	-1.429334	-1.972534	-0.000345
H	-0.000001	0.759445	0.000123
H	1.429330	-1.972535	-0.000292
H	2.155335	-0.266292	-0.000014
H	-2.155327	-0.266297	-0.000073
9
[K(C3H5)], Cs; B3PW91-D3BJ/def2TZVPD; ?Gø = -717.145928 au
C	0.091547	-1.083971	1.259976
H	1.174541	-1.015763	1.374551
H	-0.455959	-1.377727	2.146908
C	-0.459311	-1.296126	0.000000
H	-0.455959	-1.377727	-2.146908
H	1.174541	-1.015763	-1.374551
C	0.091547	-1.083971	-1.259976
H	-1.519250	-1.565233	0.000000
K	0.091547	1.428244	0.000000
9
[Cs(C3H5)], Cs; B3PW91-D3BJ/def2TZVPD; ?Gø = -137.460753 au
C	1.838331	-0.649397	1.256769
H	2.157136	0.386689	1.373797
H	1.898302	-1.263499	2.147183
C	1.838331	-1.241209	0.000000
H	1.898302	-1.263499	-2.147183
H	2.157136	0.386689	-1.373797
C	1.838331	-0.649397	-1.256769
H	1.697613	-2.325684	0.000000
Cs	-0.779972	0.351260	0.000000
32
[A?]-, C1; B3PW91-D3BJ/def2TZVPD; ?Gø = -934.470190 au
C	-1.263870	-0.970208	-0.000198
C	0.000000	-0.386600	-0.000065
C	1.263870	-0.970208	-0.000111
C	-3.932017	-0.421855	1.494831
C	-2.521631	1.818193	0.000071
C	-3.932217	-0.421721	-1.494746
C	3.932345	-0.422495	1.494435
C	2.521631	1.818193	0.000868
C	3.931889	-0.421080	-1.495142
H	-1.300798	-2.062731	-0.000385
H	0.000000	0.707706	0.000117
H	1.300799	-2.062731	-0.000280
H	-4.891926	0.104536	1.441175
H	-3.430850	-0.134408	2.423452
H	-4.140611	-1.494968	1.554826
H	-1.955386	2.126946	-0.882594
H	-1.955277	2.126847	0.882701
H	-3.472841	2.359783	0.000163
H	-3.431208	-0.134129	-2.423406
H	-4.892147	0.104609	-1.440875
H	-4.140762	-1.494839	-1.554843
H	3.431441	-0.135332	2.423284
H	4.892293	0.103817	1.440724
H	4.140848	-1.495651	1.553990
H	1.955238	2.127298	-0.881579
H	3.472841	2.359783	0.001005
H	1.955425	2.126495	0.883716
H	4.140516	-1.494157	-1.555685
H	4.891784	0.105320	-1.441322
H	3.430620	-0.133196	-2.423572
Si	-2.813136	-0.051582	-0.000018
Si	2.813136	-0.051582	-0.000002
33
[KA?], C1; B3PW91-D3BJ/def2TZVPD; ?Gø = -1534.354455 au
C	1.258373	0.014273	-0.838125
C	-0.002479	0.358132	-0.352839
C	-1.262402	-0.000073	-0.830763
C	3.992988	1.432643	-1.153027
C	2.548050	1.399227	1.548070
C	3.801565	-1.134852	0.421080
C	-3.958074	1.507115	-1.116710
C	-2.551114	1.314206	1.593754
C	-3.850235	-1.137132	0.334845
H	1.284152	-0.460152	-1.826731
H	-1.287816	-0.474735	-1.819377
H	4.957361	1.626336	-0.674343
H	3.539355	2.392890	-1.410756
H	4.185445	0.899062	-2.088292
H	1.933762	0.836153	2.256112
H	2.040720	2.346254	1.348921
H	3.497478	1.625371	2.040816
H	3.270221	-1.709994	1.188011
H	4.797194	-0.912775	0.816653
H	3.933352	-1.781077	-0.452831
H	-3.473652	2.463857	-1.327329
H	-4.921297	1.708330	-0.638670
H	-4.156130	1.021413	-2.076537
H	-1.957228	0.706795	2.282393
H	-3.501154	1.539337	2.085764
H	-2.021718	2.258185	1.443291
H	-3.979333	-1.740911	-0.569132
H	-4.847863	-0.908480	0.721355
H	-3.346472	-1.758163	1.084110
Si	2.841870	0.437199	-0.043127
Si	-2.847387	0.429689	-0.041902
H	-0.002893	0.910418	0.590843
K	0.014407	-2.381357	0.030443
33
[CsA?], C1; B3PW91-D3BJ/def2TZVPD; ?Gø = -954.669641 au
C	1.258288	0.667660	-0.838923
C	-0.000160	0.997515	-0.341741
C	-1.258552	0.667329	-0.838866
C	3.897814	2.292263	-1.031367
C	2.548218	1.813158	1.669196
C	3.906709	-0.472380	0.177628
C	-3.897064	2.294200	-1.029644
C	-2.548548	1.809975	1.670440
C	-3.908088	-0.472388	0.174735
H	1.283486	0.239535	-1.847737
H	-1.283689	0.239196	-1.847675
H	4.860319	2.487321	-0.549154
H	3.375409	3.244759	-1.151009
H	4.098283	1.900174	-2.032566
H	1.985048	1.129355	2.310431
H	1.986826	2.748711	1.609275
H	3.498795	2.026584	2.165396
H	3.449370	-1.172029	0.885859
H	4.906173	-0.237758	0.555293
H	4.031042	-0.994768	-0.776196
H	-3.374037	3.246549	-1.147720
H	-4.859517	2.489124	-0.547264
H	-4.097648	1.903799	-2.031479
H	-1.986369	1.124637	2.310910
H	-3.499107	2.023688	2.166546
H	-1.986150	2.745030	1.612166
H	-4.032692	-0.992875	-0.780090
H	-4.907416	-0.237730	0.552729
H	-3.451323	-1.173729	0.881653
Si	2.843675	1.083706	-0.041880
Si	-2.843971	1.083325	-0.041853
H	-0.000197	1.498402	0.630195
Cs	0.000288	-2.039280	0.009708
1
[K]+, KH; B3PW91-D3BJ/def2TZVP; ?Gø = -599.721784 au
K	0.000000	0.000000	0.000000
16
[K(toluene)]+, C1; B3PW91-D3BJ/def2TZVP; ?Gø = -871.226474 au
C	0.962286	2.141497	-0.044274
C	0.976974	1.413069	-1.230175
C	1.075622	1.505730	1.196376
H	0.896422	3.223609	-0.081870
C	1.096112	0.026305	-1.199065
H	0.921108	1.931710	-2.180344
C	1.184268	0.111403	1.211461
C	1.199451	-0.622035	0.028636
H	1.138283	-0.539868	-2.121816
H	1.292881	-0.402105	2.160794
H	1.317990	-1.698852	0.065357
C	1.140517	2.298382	2.466249
H	0.590626	3.236995	2.387218
H	0.753919	1.735023	3.316423
H	2.179415	2.552516	2.694488
K	-1.765858	0.503718	0.078465
15
(toluene), C1; B3PW91-D3BJ/def2TZVP; ?Gø = -271.486190 au
C	-4.507310	0.809301	-0.002385
C	-3.119940	0.812166	0.012204
C	-2.404665	2.007381	0.016028
C	-3.119713	3.202885	0.010637
C	-4.506951	3.206048	-0.003960
C	-5.207028	2.007701	-0.011519
H	-5.043705	-0.132565	-0.002819
H	-2.581006	-0.129403	0.023089
H	-2.580542	4.144349	0.020300
H	-5.043180	4.148008	-0.005638
H	-6.290489	2.007863	-0.019847
C	-0.904817	2.007548	-0.000992
H	-0.526868	2.020439	-1.028048
H	-0.501280	2.885653	0.506205
H	-0.501342	1.117247	0.484368
33
[KA?], C1; B3PW91-D3BJ/def2TZVP; ?Gø = -1534.351892 au
C	1.260365	0.000208	-0.828207
H	1.285787	0.467071	-1.820397
C	-0.000100	-0.348409	-0.344975
C	-1.260525	0.000699	-0.827975
H	-1.285929	0.467549	-1.820174
Si	2.845315	-0.434934	-0.042236
Si	-2.845522	-0.434687	-0.042203
C	-2.550964	-1.318239	1.594336
H	-1.961218	-0.709477	2.285195
H	-3.501867	-1.546482	2.083117
H	-2.018345	-2.260504	1.445026
C	-3.948257	-1.516876	-1.120278
H	-4.911874	-1.721958	-0.644855
H	-4.145759	-1.032401	-2.080741
H	-3.459197	-2.471504	-1.329225
C	-3.856996	1.127272	0.332248
H	-3.984787	1.731894	-0.571294
H	-4.855300	0.893478	0.713621
H	-3.359719	1.749246	1.084950
C	3.856173	1.127232	0.333172
H	3.358484	1.748736	1.085998
H	4.854432	0.893614	0.714772
H	3.984068	1.732270	-0.570079
C	3.948715	-1.516185	-1.120556
H	4.912288	-1.721134	-0.644987
H	3.460064	-2.470894	-1.330084
H	4.146282	-1.031175	-2.080736
C	2.550732	-1.319242	1.593882
H	2.018389	-2.261584	1.444077
H	3.501615	-1.547426	2.082729
H	1.960702	-0.710937	2.284900
H	-0.000120	-0.896589	0.601116
K	0.000529	2.392323	0.030492
48
[(toluene)KA?], C1; B3PW91-D3BJ/def2TZVP; ?Gø = -1805.843067 au
C	-0.321381	2.143367	-0.781290
H	-0.228298	2.454087	-1.828320
C	0.812211	1.574437	-0.203465
C	1.995442	1.152452	-0.805424
H	2.135221	1.440318	-1.853939
Si	-1.866788	2.526474	0.096769
Si	3.369698	0.318585	0.047043
C	2.989260	0.112936	1.880971
H	2.052331	-0.424176	2.042793
H	3.785381	-0.444734	2.381377
H	2.901262	1.084888	2.372196
C	5.012025	1.227967	-0.118160
H	5.832889	0.682522	0.356663
H	5.270743	1.369449	-1.171448
H	4.948305	2.218222	0.339520
C	3.672658	-1.412161	-0.672627
H	3.875416	-1.348481	-1.746533
H	4.527342	-1.912726	-0.207727
H	2.798250	-2.056417	-0.537193
C	-3.311274	1.499579	-0.588659
H	-3.121687	0.430540	-0.451123
H	-4.262655	1.732909	-0.101156
H	-3.438019	1.680521	-1.660769
C	-2.399838	4.325592	-0.072584
H	-3.361829	4.516094	0.412186
H	-1.654149	4.988591	0.372908
H	-2.496666	4.602085	-1.126400
C	-1.714229	2.117977	1.929469
H	-0.953788	2.740812	2.406341
H	-2.662293	2.291201	2.445615
H	-1.432890	1.074742	2.087947
H	0.726094	1.347124	0.862479
C	-2.351143	-2.676846	0.143492
C	-1.922122	-1.773944	1.120344
C	-1.421505	-3.584451	-0.368714
C	-0.610080	-1.783066	1.576059
H	-2.623814	-1.053485	1.524993
C	-0.106241	-3.598789	0.087757
H	-1.736420	-4.298055	-1.123293
C	0.304095	-2.697808	1.063873
H	-0.297330	-1.068712	2.327774
H	0.597458	-4.317756	-0.316191
H	1.327124	-2.701609	1.417880
C	-3.779326	-2.686767	-0.314868
H	-4.413481	-3.196999	0.415696
H	-4.169551	-1.673608	-0.428320
H	-3.890161	-3.208264	-1.266601
K	-0.114043	-0.548566	-1.748303
5
CH4, C1; B3PW91-D3BJ/def2TZVP; ?Gø = -40.497662au
C	-1.278088	-0.691598	-0.579000
H	-0.433917	-0.106479	-0.215856
H	-1.193445	-1.715231	-0.215856
H	-1.278088	-0.691598	-1.668432
H	-2.206902	-0.253085	-0.215856
14
HSiMe3, C1; B3PW91-D3BJ/def2TZVP; ?Gø = -409.780622
Si	2.767274	0.873835	0.027763
C	0.892787	0.860375	0.006378
H	0.490562	1.398994	0.868683
H	0.504330	1.337327	-0.896658
H	0.504456	-0.160405	0.038937
C	3.403899	0.026597	1.574104
H	3.053722	-1.006833	1.631177
H	4.496220	0.011219	1.595264
H	3.059166	0.546707	2.471938
C	3.403835	2.635115	-0.055294
H	4.496162	2.660882	-0.059200
H	3.054159	3.139603	-0.959211
H	3.058592	3.213856	0.805707
H	3.264487	0.128827	-1.164921
38
[(CH4)KA?], C1; B3PW91-D3BJ/def2TZVP; ?Gø = -1574.844841
C	-0.002377	0.757466	2.909640
H	-0.426098	0.071136	2.176212
H	-0.577046	1.685067	2.943894
H	1.042194	0.960921	2.670950
C	-1.263936	-0.727767	-0.957235
C	1.258398	-0.732355	-0.962530
C	-0.002337	-1.077575	-0.479788
H	-0.000711	-1.634603	0.460897
H	-1.295465	-0.250597	-1.944272
H	1.288125	-0.259163	-1.951479
Si	2.836009	-1.143348	-0.151432
Si	-2.844141	-1.134753	-0.148161
C	-4.072096	-1.947643	-1.321933
H	-3.683244	-2.903890	-1.680235
H	-5.038248	-2.128262	-0.842094
H	-4.247684	-1.315769	-2.197341
C	-3.705451	0.429129	0.501814
H	-4.692312	0.217083	0.923918
H	-3.111209	0.905223	1.289357
H	-3.845026	1.157785	-0.303606
C	-2.573292	-2.268500	1.330224
H	-1.935325	-1.811839	2.090928
H	-3.527991	-2.509407	1.805547
H	-2.104528	-3.206287	1.023007
C	3.765858	0.432142	0.360931
H	4.754756	0.214939	0.775407
H	3.910571	1.093278	-0.499733
H	3.210871	0.989903	1.123381
C	4.019579	-2.093702	-1.266867
H	3.586507	-3.055829	-1.551208
H	4.215007	-1.536875	-2.187800
H	4.980843	-2.280783	-0.779561
C	2.538379	-2.147393	1.412824
H	3.485761	-2.370898	1.910605
H	1.907332	-1.612558	2.126854
H	2.049031	-3.096830	1.182882
H	-0.047836	0.288747	3.890858
K	0.008945	1.690708	-0.168958
47
[(HSiMe3)KA?], C1; B3PW91-D3BJ/def2TZVP; ?Gø = -1944.129553
Si	1.548786	-3.197492	-0.875439
C	0.565952	-1.634453	-1.242266
H	0.719849	-0.914053	-0.434050
H	0.912366	-1.204039	-2.187450
H	-0.501514	-1.857295	-1.316621
C	0.959517	-3.972011	0.719879
H	-0.098017	-4.238664	0.665826
H	1.524935	-4.881540	0.936631
H	1.089093	-3.288589	1.562057
C	3.371593	-2.785635	-0.803781
H	3.964978	-3.683869	-0.617457
H	3.716273	-2.345231	-1.742276
H	3.577272	-2.072923	-0.002690
H	1.308688	-4.150143	-1.998688
C	0.591833	1.785454	1.111602
C	-1.837706	1.098802	1.117063
C	-0.473655	0.913902	1.329376
H	-0.189369	-0.096998	1.633093
H	0.333742	2.827575	0.889620
H	-2.166573	2.123197	0.906169
Si	-3.091512	-0.213588	1.252533
Si	2.347894	1.356778	1.334313
C	3.281953	2.645520	2.339972
H	2.868309	2.718285	3.348670
H	4.346202	2.406953	2.421695
H	3.197169	3.633242	1.877690
C	3.262574	1.237611	-0.325995
H	4.329224	1.029070	-0.199952
H	2.847131	0.442351	-0.952275
H	3.177771	2.179638	-0.877790
C	2.516740	-0.315146	2.184746
H	2.001432	-1.106561	1.636819
H	3.567323	-0.604148	2.273629
H	2.089226	-0.280967	3.189480
C	-3.888876	-0.562979	-0.437315
H	-4.704268	-1.289394	-0.371138
H	-4.303763	0.353824	-0.868948
H	-3.155062	-0.966752	-1.144218
C	-4.512106	0.221630	2.409369
H	-4.144067	0.365866	3.428094
H	-4.992420	1.153989	2.098980
H	-5.278631	-0.558406	2.428621
C	-2.301595	-1.822966	1.825427
H	-3.044991	-2.623185	1.871190
H	-1.509559	-2.144786	1.145593
H	-1.861369	-1.716507	2.819626
K	-0.614461	1.273587	-1.437122
33
[CsA?], C1; B3PW91-D3BJ/def2TZVP; ?Gø = -954.667180 au
Cs	0.000088	-2.027380	-0.124445
C	1.258151	0.716884	-0.854675
C	-1.258451	0.716676	-0.854666
C	-0.000173	1.020308	-0.340920
H	-0.000206	1.468957	0.656228
H	1.284018	0.345858	-1.885612
H	-1.284263	0.345644	-1.885602
Si	-2.843159	1.092355	-0.036992
Si	2.842800	1.092751	-0.036979
C	3.888238	2.366265	-0.951178
H	3.359777	3.320919	-1.011501
H	4.850130	2.537275	-0.458876
H	4.089589	2.037856	-1.974769
C	3.915122	-0.467645	0.084885
H	4.914270	-0.249912	0.473050
H	3.464562	-1.211812	0.750691
H	4.039374	-0.930397	-0.899187
C	2.547804	1.714287	1.716531
H	1.990654	0.989250	2.316384
H	3.498519	1.902843	2.222303
H	1.980883	2.648357	1.715540
C	-3.915283	-0.468173	0.084886
H	-4.914457	-0.250564	0.473056
H	-4.039483	-0.930946	-0.899184
H	-3.464623	-1.212279	0.750690
C	-3.888741	2.365725	-0.951227
H	-3.360396	3.320441	-1.011562
H	-4.090043	2.037271	-1.974814
H	-4.850660	2.536626	-0.458937
C	-2.548258	1.713960	1.716510
H	-3.499001	1.902400	2.222271
H	-1.991017	0.989006	2.316379
H	-1.981460	2.648104	1.715507
38
[(CH4)CsA?], C1; B3PW91-D3BJ/def2TZVP; ?Gø = -995.160046 au
C	-0.019240	0.640329	3.020465
H	-0.215038	0.007261	2.155324
H	-0.780328	1.417730	3.099897
H	0.971887	1.087922	2.939393
Cs	0.016536	2.001289	-0.333872
C	-1.260467	-0.758800	-0.987196
C	1.258471	-0.768876	-0.992663
C	-0.001105	-1.079523	-0.487652
H	-0.000176	-1.573141	0.487890
H	-1.292037	-0.350932	-2.003888
H	1.288847	-0.362917	-2.010212
Si	2.838209	-1.146397	-0.167083
Si	-2.841692	-1.122964	-0.157703
C	-4.078003	-1.953528	-1.310048
H	-3.699448	-2.923166	-1.642460
H	-5.046172	-2.110802	-0.826117
H	-4.246547	-1.343300	-2.202117
C	-3.689409	0.463863	0.454136
H	-4.674746	0.266083	0.886421
H	-3.089339	0.954949	1.227795
H	-3.831371	1.173846	-0.367473
C	-2.580182	-2.215303	1.352331
H	-1.939245	-1.738456	2.097722
H	-3.536345	-2.435868	1.834606
H	-2.116835	-3.164219	1.072401
C	3.758482	0.443652	0.317406
H	4.747320	0.236679	0.737084
H	3.903387	1.091988	-0.553028
H	3.199647	1.009072	1.071122
C	4.025569	-2.108124	-1.268383
H	3.600220	-3.079683	-1.531500
H	4.212262	-1.568075	-2.201110
H	4.990461	-2.276533	-0.781471
C	2.551602	-2.118970	1.418253
H	3.502771	-2.334153	1.912562
H	1.928415	-1.567738	2.126441
H	2.057985	-3.071284	1.210688
H	-0.052533	0.024989	3.917935
47
[(HSiMe3)CsA?], C1; B3PW91-D3BJ/def2TZVP; ?Gø = -1364.442217
Si	1.576822	-3.239908	-0.823831
C	0.583980	-1.703397	-1.259577
H	0.704277	-0.948930	-0.477724
H	0.942948	-1.297719	-2.210325
H	-0.479145	-1.937813	-1.353694
C	0.982625	-3.970128	0.791313
H	-0.071293	-4.250533	0.736424
H	1.556714	-4.865487	1.041835
H	1.095847	-3.258984	1.612569
C	3.396336	-2.810250	-0.749835
H	3.996098	-3.695492	-0.525558
H	3.745006	-2.401440	-1.701151
H	3.588795	-2.066771	0.026087
H	1.361002	-4.236767	-1.913896
Cs	-0.665046	1.563638	-1.699661
C	0.580855	1.799290	1.156781
C	-1.843279	1.105725	1.135634
C	-0.477508	0.907890	1.314048
H	-0.186880	-0.124083	1.526977
H	0.318011	2.855441	1.032742
H	-2.177086	2.142593	1.017233
Si	-3.099498	-0.209650	1.236122
Si	2.340558	1.361342	1.337737
C	3.287033	2.654475	2.325450
H	2.891584	2.726659	3.341444
H	4.353317	2.419673	2.388158
H	3.190759	3.641492	1.863726
C	3.230733	1.238432	-0.336129
H	4.296475	1.018749	-0.222200
H	2.801004	0.446977	-0.957532
H	3.150933	2.181900	-0.886478
C	2.525663	-0.311873	2.180521
H	1.998263	-1.098987	1.638127
H	3.576650	-0.604672	2.250103
H	2.114063	-0.279197	3.191869
C	-3.953146	-0.473901	-0.440600
H	-4.772664	-1.195740	-0.376989
H	-4.374236	0.463789	-0.817915
H	-3.247408	-0.852875	-1.188074
C	-4.479067	0.177242	2.458304
H	-4.077578	0.268784	3.470482
H	-4.961709	1.126800	2.209609
H	-5.250794	-0.597899	2.464009
C	-2.303585	-1.848971	1.705331
H	-3.050783	-2.646434	1.735150
H	-1.535141	-2.141037	0.986393
H	-1.832192	-1.792996	2.689281
	
